# Supplementary material for: DFIQ, a Novel Quinoline Derivative, Shows Anticancer Potential by Inducing Apoptosis and Autophagy in NSCLC Cell and In Vivo Zebrafish Xenograft Models
Source: PubMed Central journal article supplement (PMC7281296; doi:10.3390/cancers12051348), 2020-05-25
Supplement: cancers-12-01348-s001.pdf [file cancers-12-01348-s001.pdf]

## Supplementary Materials

# DFIQ, a Novel Quinoline Derivative, Shows Anticancer Potential by Inducing Apoptosis and Autophagy in NSCLC Cell and In Vivo Zebrafish Xenograft Models

Hung-Wern Huang, Yung-Ding Bow, Chia-Yih Wang, Yen-Chun Chen, Pei-Rong Fu, Kuo-Feng Chang, Tso-Wen Wang, Chih-Hua Tseng, Yeh-Long Chen and Chien-Chih Chiu

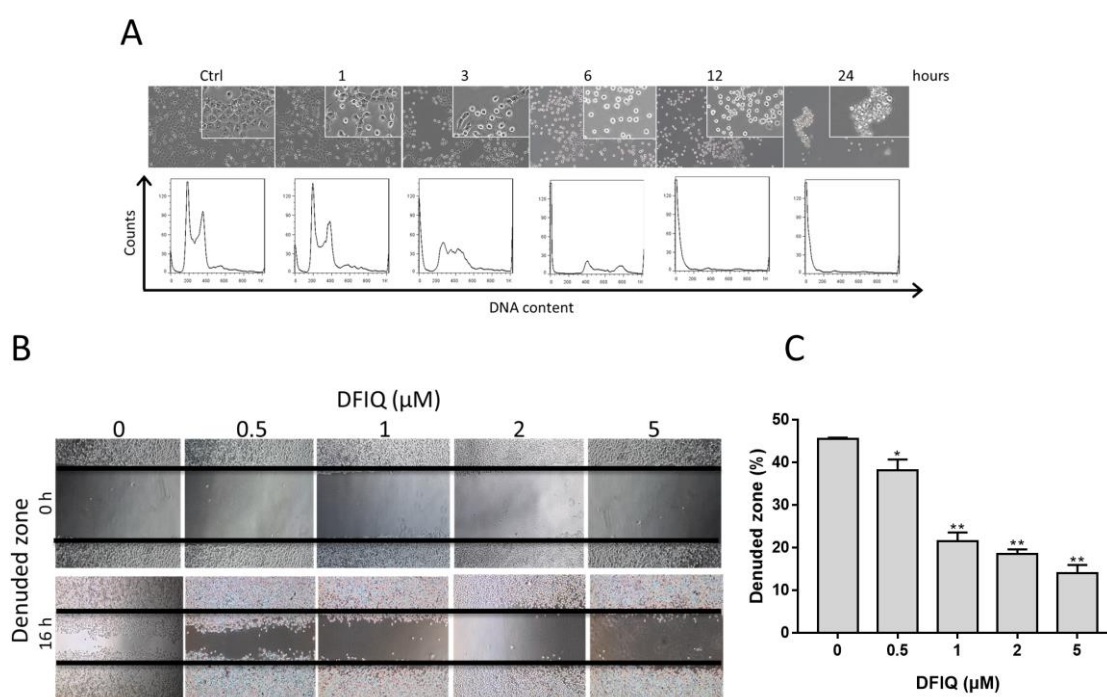

**Figure S1.** DFIQ inhibited cell growth and cell migration. **(A)** The cell cycle distribution of cells treated with 5  $\mu\text{M}$  DFIQ was monitored at 1, 3, 6, 12, and 24 h with flow cytometry. **(B)** Cell migration was measured with the wound healing assay. Cells were treated with 0.5, 1, 2, or 5  $\mu\text{M}$  DFIQ for 6 h, and gap closure was measured at 16 h after scratching. **(C)** Quantification of the area of the wound in **(B)**. \*  $p < 0.05$ , \*\*  $p < 0.01$ , compared to the control group.

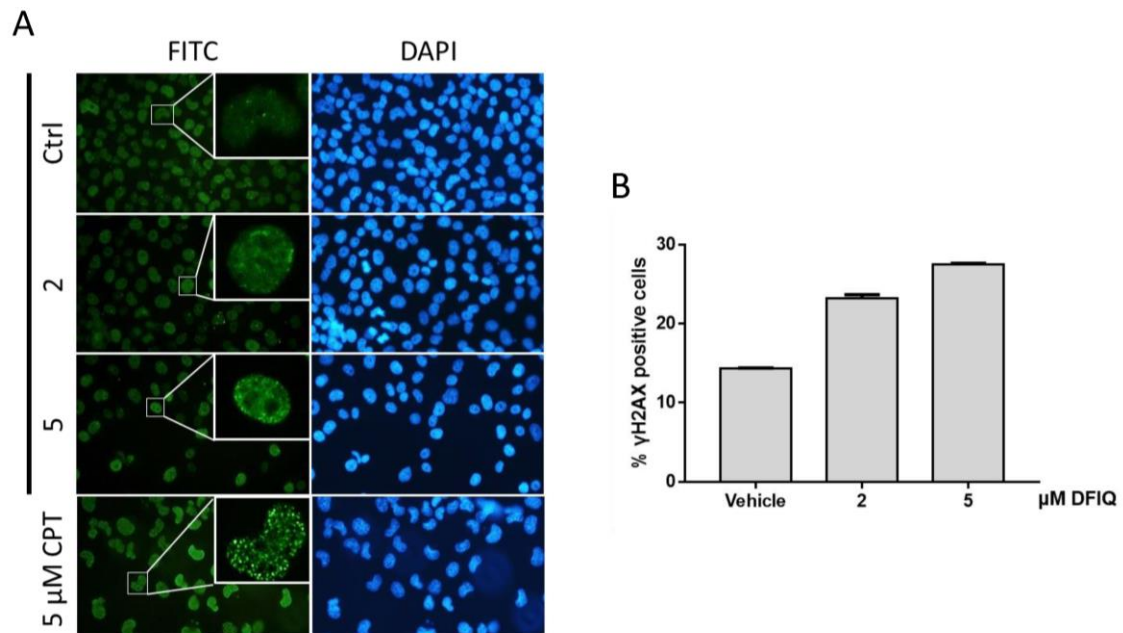

**Figure S2.** DFIQ induced DNA damage. (A) DNA damage was visualized with  $\gamma$ H2AX staining in cells treated with 2 and 5  $\mu$ M DFIQ. (B) Quantification of  $\gamma$ H2AX-positive cells in (A).

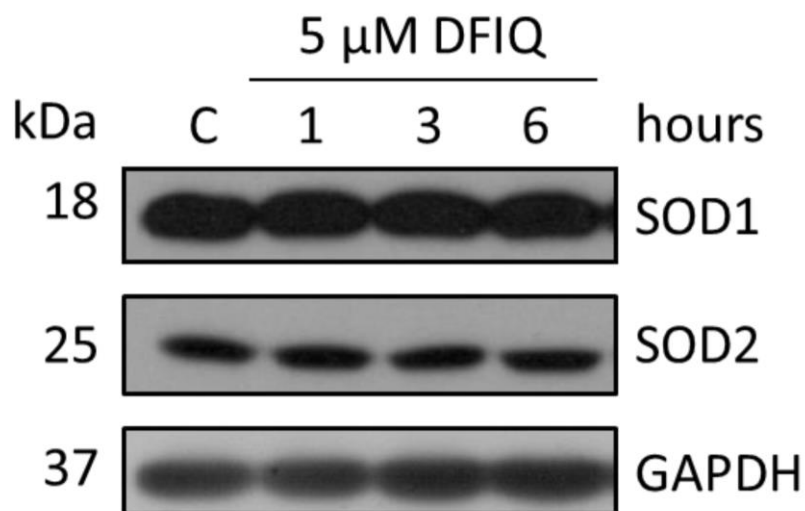

**Figure S3.** No alterations in the expression of the SOD family of proteins was observed after DFIQ treatment. Western blot analysis of SOD family protein expression after DFIQ treatment.

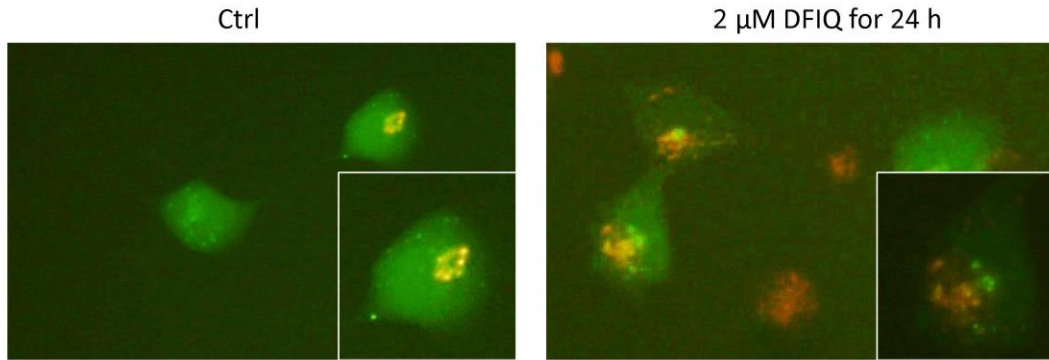

**Figure S4.** DFIQ inhibited autophagosome-lysosome fusion. We labeled the autosomal protein LC3 with GFP (green) and the lysosomal protein LAMP2 with DsRed (red) and observed colocalization of LC3 and LAMP2 after 2 μM DFIQ treatment.

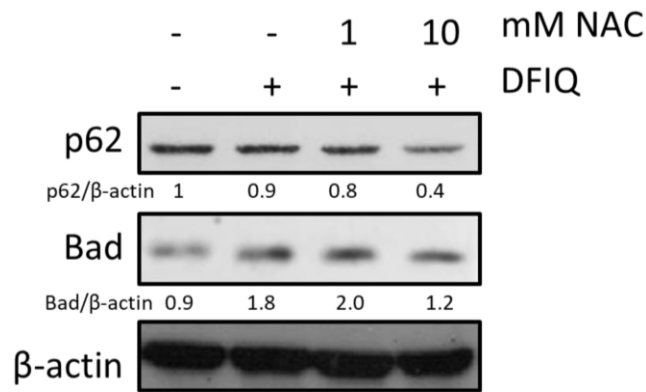

**Figure S5.** Crosstalk between autophagy and ROS during DFIQ treatment. Western blot analysis of p62 and Bad expression after 5 μM DFIQ and NAC treatment.

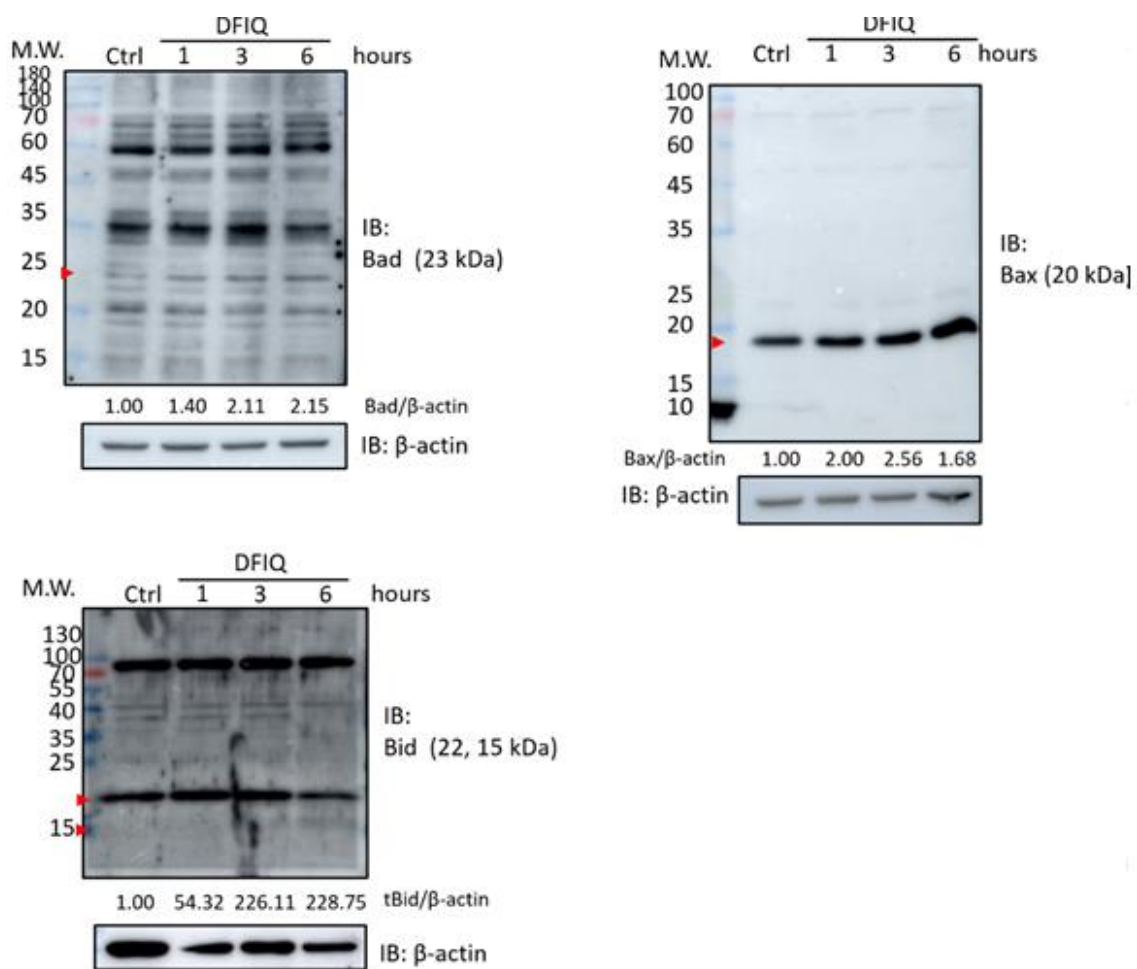

**Figure S6.** The uncropped blots and molecular weight markers of Figure 2D.

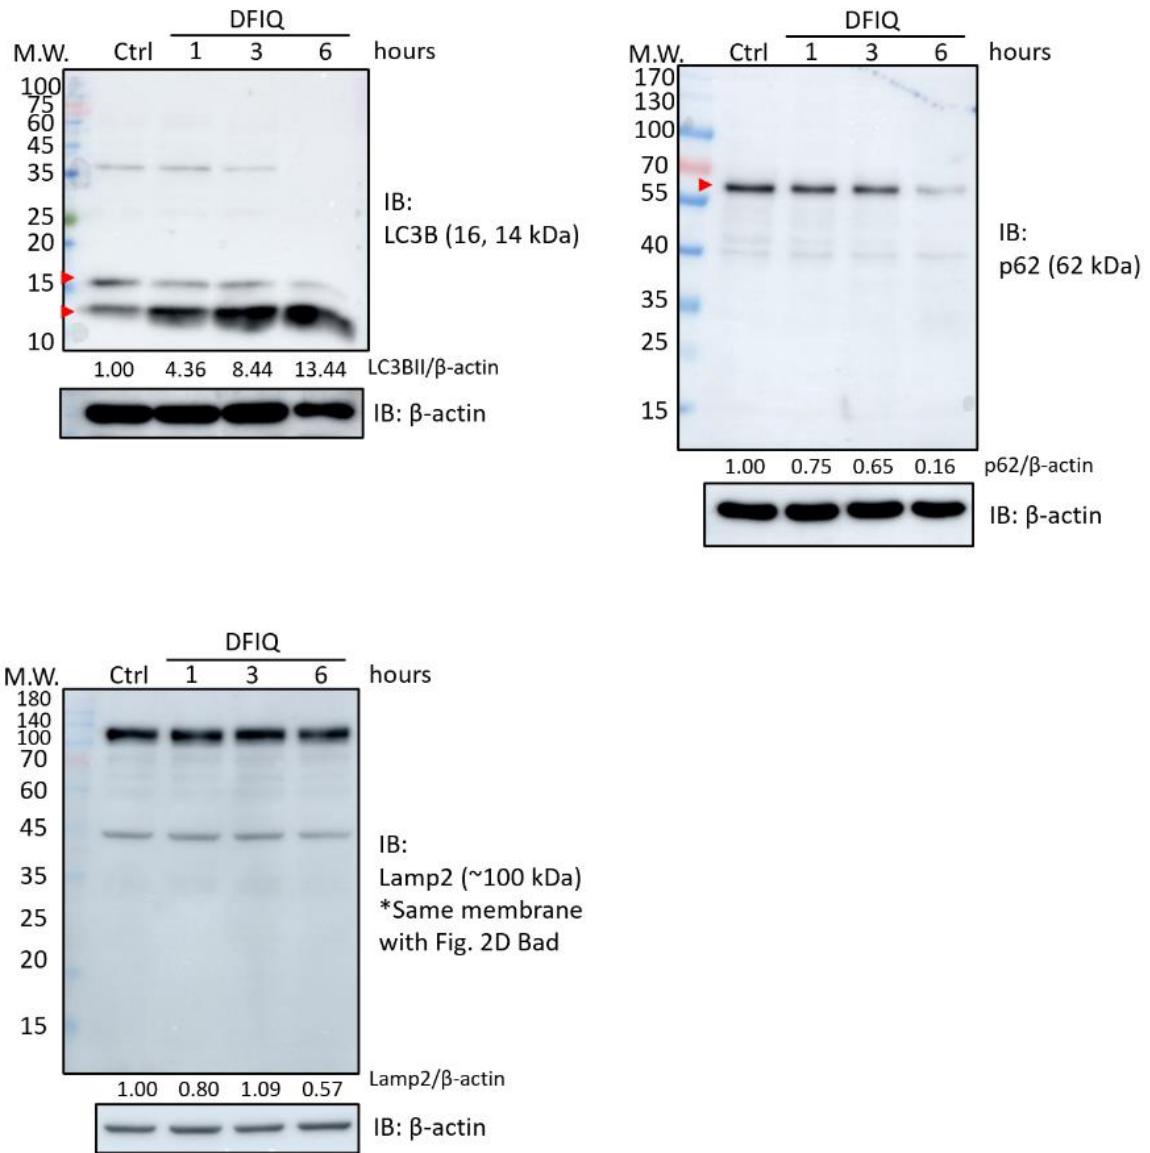

**Figure S7.** The uncropped blots and molecular weight markers of Figure 4A.

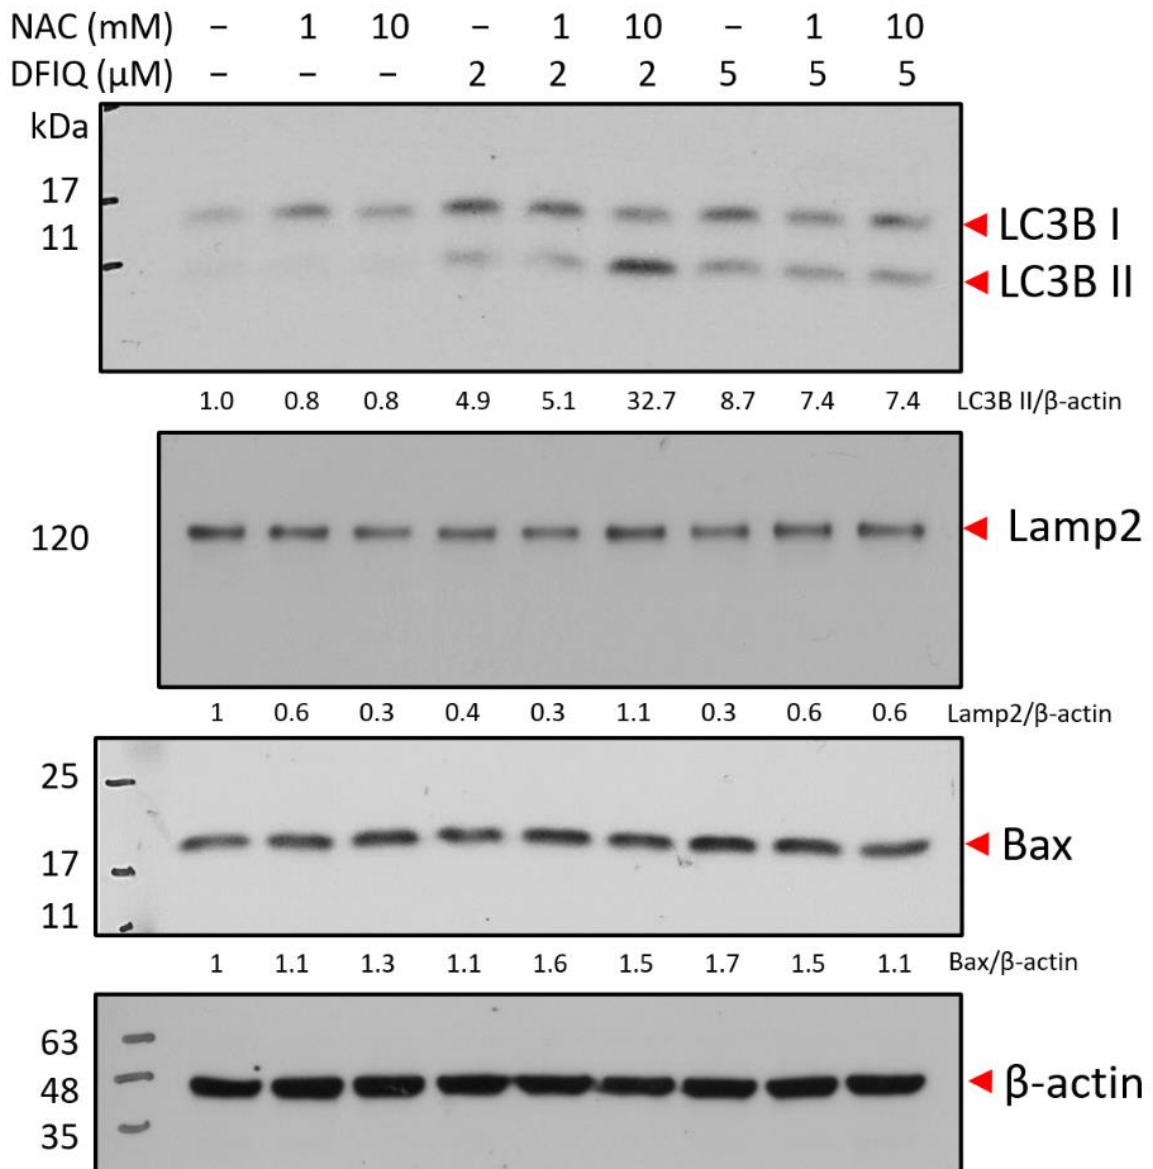

**Figure S8.** The uncropped blots and molecular weight markers of Figure 5A.

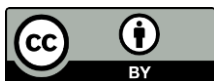

© 2020 by the authors. Licensee MDPI, Basel, Switzerland. This article is an open access article distributed under the terms and conditions of the Creative Commons Attribution (CC BY) license (<http://creativecommons.org/licenses/by/4.0/>).
